# Supplementary material for: More is not always better: downscaling climate model outputs from 30 to 5-minute resolution has minimal impact on coherence with Late Quaternary proxies
Source: Copernicus journal article supplement (doi:10.5194/cp-2024-53), 2024-07-31
Supplement: Supplementary file 1 [file cp-2024-53-supplement.pdf]

## More is not always better: downscaling climate model outputs from 30 to 5-minute resolution has minimal impact on coherence with Late Quaternary proxies – Supplementary Online Materials

SOM. 1 Energetic cost of movement calculation.

First, we calculate the slope  $m$  of the terrain from the altitude  $z$  and the distance between cell centres  $d$  for each pair of cells  $i$  and  $j$  in the global relief map from ETOPO2022 (NOAA National Centres for Environmental Information, 2022):

$$m_{ij} = (z_j - z_i)/d_{ij}$$

We then transformed the slope ( $m$ ) raster into values of energy expenditure (Joules per metre per second for an average 60kg person) following Minetti *et al.* [4]. This formula accounts for the fact that there are different energetic costs ( $cw$ ) associated with moving on flat ground vs 10° slopes compared to 10° and 20° slopes, despite the difference in slope being the same.

$$cw = 60 \cdot ((280.5m^5) - (58.7m^4) - (76.8m^3) + (51.9m^2) + (19.6m) + 2.5)$$

## Supplementary figures

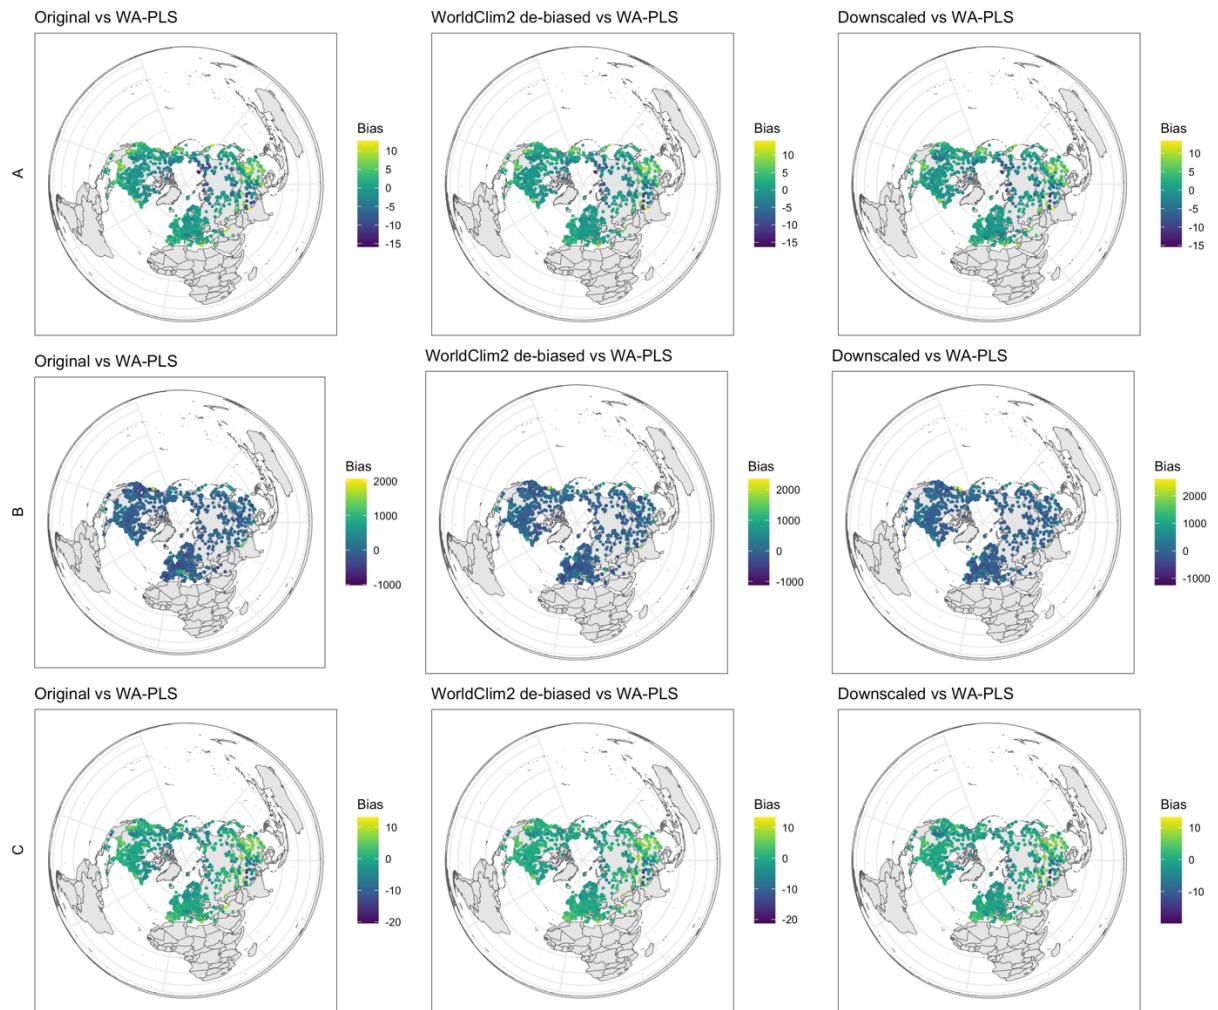

Figure S1. Absolute bias for mean annual temperature (A), mean annual precipitation (B), and mean July temperature (C) for each site comparing the WA-PLS method of proxy reconstruction with different models

Supplementary Tables:

Table S1. Proportion of proxy records (reconstructed using the MAT and WA-PLS methods) that show higher error with lower resolution (30 min) models compared to the downscaled model (5 min). Those where the proportion is higher than 0.5 (and therefore highlights a positive effect of downscaling) is shaded in grey.

|                         | 30 min<br>model<br>version | Proxy<br>method | All  | Europe | Asia | West<br>North<br>America | East<br>North<br>America | MIS 1 | MIS 2 | High<br>altitude | Low<br>altitude | High<br>roughness | Low<br>roughness |
|-------------------------|----------------------------|-----------------|------|--------|------|--------------------------|--------------------------|-------|-------|------------------|-----------------|-------------------|------------------|
| Annual<br>temperature   | Raw                        | MAT             | 0.51 | 0.41   | 0.56 | 0.55                     | 0.61                     | 0.5   | 0.58  | 0.54             | 0.5             | 0.57              | 0.49             |
|                         |                            | WA-PLS          | 0.49 | 0.4    | 0.53 | 0.5                      | 0.61                     | 0.48  | 0.55  | 0.52             | 0.49            | 0.55              | 0.48             |
|                         | Raw WC                     | MAT             | 0.49 | 0.47   | 0.51 | 0.5                      | 0.51                     | 0.48  | 0.55  | 0.46             | 0.5             | 0.5               | 0.49             |
|                         |                            | WA-PLS          | 0.46 | 0.44   | 0.48 | 0.48                     | 0.49                     | 0.46  | 0.51  | 0.42             | 0.47            | 0.46              | 0.47             |
| Annual<br>precipitation | Raw                        | MAT             | 0.55 | 0.59   | 0.51 | 0.47                     | 0.57                     | 0.56  | 0.46  | 0.63             | 0.54            | 0.59              | 0.54             |
|                         |                            | WA-PLS          | 0.55 | 0.59   | 0.51 | 0.38                     | 0.62                     | 0.55  | 0.48  | 0.56             | 0.55            | 0.54              | 0.55             |
|                         | Raw WC                     | MAT             | 0.48 | 0.49   | 0.47 | 0.49                     | 0.48                     | 0.48  | 0.45  | 0.49             | 0.48            | 0.47              | 0.49             |
|                         |                            | WA-PLS          | 0.48 | 0.5    | 0.49 | 0.48                     | 0.46                     | 0.48  | 0.49  | 0.45             | 0.49            | 0.47              | 0.49             |
| July<br>Temperature     | Raw                        | MAT             | 0.58 | 0.54   | 0.52 | 0.6                      | 0.68                     | 0.58  | 0.54  | 0.52             | 0.59            | 0.57              | 0.58             |
|                         |                            | WA-PLS          | 0.56 | 0.52   | 0.54 | 0.56                     | 0.63                     | 0.55  | 0.56  | 0.49             | 0.57            | 0.57              | 0.55             |
|                         | Raw WC                     | MAT             | 0.47 | 0.46   | 0.45 | 0.49                     | 0.51                     | 0.46  | 0.55  | 0.46             | 0.48            | 0.49              | 0.47             |
|                         |                            | WA-PLS          | 0.48 | 0.47   | 0.45 | 0.48                     | 0.47                     | 0.46  | 0.52  | 0.43             | 0.47            | 0.47              | 0.47             |
